# Supplementary material for: Establishment and validation of a risk prediction model for adverse drug reactions in patients with coronary heart disease after taking statins: a retrospective study
Source: PeerJ. 2025 Jul 1;13:e19630. doi: 10.7717/peerj.19630 (PMC12226984; doi:10.7717/peerj.19630)
Supplement: Supplemental Information 2 [file peerj-13-19630-s002.xlsx]

## Sheet: Sheet2
Variables	Value code	Annotation
id
Group
	1	Development group
	2	Validation group
Outcome
	0	Non-ADR
	1	ADR
Gender
	1	Male
	2	Female
Age
	1	<60 years old
	2	≥ 60 years old
Education level
	1	Junior high school and below
	2	High school and technical secondary
	3	College degree or above
BMI
	1	<23kg/m^2
	2	≥ 23kg/m^2
Type of residence
	1	Countryside
	2	City
Medical expense
	1	Self funded
	2	Medical insurance
Hypertension history
	0	No
	1	Yes
Presence of Dyslipidemia
	0	No
	1	Yes
Smoking
	0	No
	1	Yes
Alcohol consumption
	0	No
	1	Yes
Course of disease
	1	<5 years
	2	≥ 5 years
Basic disease type
	1	<3
	2	≥ 3
Diabetes history
	0	No
	1	Yes
Cerebral infarction history
	0	No
	1	Yes
Combined medication usage
	0	No
	1	Yes
High-dose drug utilization
	0	No
	1	Yes
